# Supplementary material for: Pain hypersensitivity in a pharmacological mouse model of Attention-Deficit/Hyperactivity Disorder (ADHD).
Source: Research Square preprint supplement (doi:10.21203/rs.3.rs-403164/v1), 2021-04-23

## SUPPLEMENTARY FIGURE LEGENDS

### Fig. S1: Methylphenidate (Mph) has no effect on nociception in 6-OHDA mice.

**A.** Paw licking latency in hot plate (55°C). **B.** Paw licking latency in cold plate (5°C). **C.** Paw withdrawal threshold using von Frey filaments. We explored the capacity of ADHD medication to alter nociception in sham and 6-OHDA mice by injecting a single dose of methylphenidate (3.0 or 5.0mg/kg Mph). Two-way ANOVA indicated a significant effect of lesion (6-OHDA) ([heat]:  $F_{(1,54)}=47.80$ ,  $p<0.0001$ ; [cold]:  $F_{(1,54)}=53.70$ ,  $p<0.0001$  and [von Frey]:  $F_{(1,54)}=82.13$ ,  $p<0.0001$ ). The treatment (Mph) ([heat]:  $F_{(2,54)}=1.18$ ,  $p=0.32$ ; [cold]:  $F_{(2,54)}=0.02$ ,  $p=0.98$  and [von Frey]:  $F_{(2,54)}=0.34$ ,  $p=0.72$ ) and interaction 6-OHDA x Mph ([heat]:  $F_{(2,54)}=0.03$ ,  $p=0.97$ ; [cold]:  $F_{(2,54)}=0.36$ ,  $p=0.70$  and [von Frey]:  $F_{(2,54)}=0.12$ ;  $p=0.89$ ) had no effect on thermal and mechanical sensitivity. Neither 3.0 mg/kg nor 5.0 mg/kg Mph influenced thermal (3.0mg/kg: sham: [heat]:  $q=0.82$ ,  $p>0.05$ ; [cold]:  $q=0.42$ ,  $p>0.05$ ; 6-OHDA: [heat]:  $q=0.72$ ,  $p>0.05$ ; [cold]:  $q=0.26$ ,  $p>0.05$ ; 5.0mg/kg: sham: [heat]:  $q=1.36$ ,  $p>0.05$ ; [cold]:  $q=1.04$ ,  $p>0.05$ ; 6-OHDA: [heat]:  $q=1.71$ ,  $p>0.05$ ; [cold]:  $q=0.64$ ,  $p>0.05$ ) or mechanical sensitivity ([3.0mg/kg]: sham:  $q=0.70$ ,  $p>0.05$ ; 6-OHDA:  $q=0.00$ ,  $p>0.05$ ; [5.0mg/kg]: sham:  $q=0.70$ ,  $p>0.05$ ; 6-OHDA:  $q=0.93$ ,  $p>0.05$ ) of sham or 6-OHDA mice. All data are means  $\pm$  SEM (10 mice per group), \*\* $p<0.01$ ; \*\*\* $p<0.001$  in comparison with sham.

**D-E.** Paw licking latency in hot plate (55°C) under inflammatory pain conditions in sham (**D**) and 6-OHDA (**E**) groups. **F-G.** Paw licking latency in cold plate (5°C) under inflammatory pain conditions in sham (**F**) and 6-OHDA (**G**) groups. **H-I.** Paw withdrawal thresholds using Von Frey filaments under inflammatory pain conditions in sham (**H**) and 6-OHDA (**I**) groups. Two-way repeated measures ANOVA showed a significant effect of treatment (Mph) ([heat]:  $F_{(5,45)}=50.22$ ,  $p<0.0001$ ; [cold]:  $F_{(5,45)}=35.39$ ,  $p<0.0001$  and [von Frey]:  $F_{(5,45)}=52.97$ ,  $p<0.0001$ ), inflammation (CFA) ([heat]:  $F_{(4,36)}=10.18$ ,  $p<0.0001$ ; [cold]:  $F_{(4,36)}=4.91$ ,  $p=0.003$  and [von Frey]:  $F_{(4,36)}=18.64$ ,  $p<0.0001$ ) and interaction Mph x CFA ([heat]:  $F_{(20,180)}=2.06$ ,  $p=0.007$ ; [cold]:  $F_{(20,180)}=2.52$ ,  $p=0.0007$  and [von Frey]:  $F_{(20,180)}=2.54$ ;  $p=0.0006$ ) on thermal and mechanical sensitivity in sham mice. There was also a significant effect of treatment (Mph) ([heat]:  $F_{(5,45)}=62.78$ ,  $p<0.0001$ ; [cold]:  $F_{(5,45)}=71.75$ ,  $p<0.0001$  and [von Frey]:  $F_{(5,45)}=97.91$ ,  $p<0.0001$ ), inflammation (CFA) ([heat]:  $F_{(4,36)}=10.14$ ,  $p<0.0001$ ; [cold]:  $F_{(4,36)}=25.46$ ,  $p<0.0001$  and [von Frey]:  $F_{(4,36)}=24.28$ ,  $p<0.0001$ ) and interaction Mph x CFA ([heat]:  $F_{(20,180)}=2.90$ ,  $p<0.0001$ ; [cold]:  $F_{(20,180)}=4.07$ ,  $p<0.0001$  and [von Frey]:  $F_{(20,180)}=4.95$ ;  $p<0.0001$ ) on thermal and mechanical sensitivity in 6-OHDA mice. Again, neither 3.0 mg/kg nor 5.0 mg/kg of Mph influenced thermal (3.0mg/kg: sham: [heat]:  $q=1.80$ ,  $p>0.05$ ; [cold]:  $q=1.77$ ,  $p>0.05$ ; 6-OHDA: [heat]:  $q=0.75$ ,  $p>0.05$ ; [cold]:  $q=1.20$ ,  $p>0.05$ ; 5.0mg/kg: sham: [heat]:  $q=2.94$ ,  $p>0.05$ ; [cold]:  $q=2.57$ ,  $p>0.05$ ; 6-OHDA: [heat]:  $q=1.76$ ,  $p>0.05$ ; [cold]:  $q=2.55$ ,  $p>0.05$ ) or mechanical ([3.0mg/kg]: sham:  $q=0.81$ ,  $p>0.05$ ; 6-OHDA:  $q=0.72$ ,  $p>0.05$ ; [5.0mg/kg]: sham:  $q=1.83$ ,  $p>0.05$ ; 6-OHDA:  $q=1.20$ ,  $p>0.05$ ) thresholds at 4 days post-CFA in both groups. All data are means  $\pm$  SEM (10 mice per group). <sup>a</sup> $p<0.05$ ; <sup>b</sup> $p<0.01$ ; <sup>c</sup> $p<0.001$  vs NaCl. <sup>d</sup> $p<0.05$ ; <sup>e</sup> $p<0.01$ ; <sup>f</sup> $p<0.001$  vs Pre-CFA.

### Fig. S2. Methylphenidate (Mph) has no effect on electrical activity of wide-dynamic range (WDR) deep dorsal horn neurons (DHNs).

**A.** Example of the identification of DHNs as wide dynamic range (WDR) neurons by *in vivo* single unit recording in sham (left) and 6-OHDA (right) mice. Peripheral electrical stimulations elicited

two distinct groups of action potentials corresponding to A (short latency) and C (long latency) fibers firing.

**B-C.** Single unit *in vivo* extracellular recordings of DHNs in response to peripheral mechanical stimulation (von Frey filament) before and after Mph treatment (5.0mg/kg i.p injection) under normal (**B**) (NaCl) and inflammatory pain (**C**) conditions (CFA).

**Fig. S3: Direct optogenetic modulation of ACC excitatory neurons potentiates sensitization of the ipsilateral paw in 6-OHDA mice.**

**A.** Activation of neurons in the left ACC of mice injected with the AAV5.CaMKII.ChR2.eGFP and behavioral assessment on the ipsilateral (left) hind paw. **A1.** Von Frey and Hargreaves tests before (Before), during (Opto) and at 2 minutes after (Recovery) illumination. There was a significant effect of 473 nm light on withdrawal thresholds to mechanical ([sham]: Before:  $3.93 \pm 0.69$  g vs Opto:  $2.10 \pm 0.44$  g;  $t=2.56$ ,  $p=0.04$ ; [6-OHDA]: Before:  $2.25 \pm 0.25$  g vs Opto:  $0.90 \pm 0.13$  g;  $t=4.28$ ,  $p=0.004$ ) and thermal stimuli ([sham]: Before:  $24.63 \pm 4.16$  s vs Opto:  $11.75 \pm 4.12$  s;  $t=2.65$ ,  $p=0.03$ ; [6-OHDA]: Before:  $19.75 \pm 2.47$  s vs Opto:  $7.63 \pm 1.76$  s;  $t=3.79$ ,  $p=0.007$ ) in both groups. After the light was turned off (Recovery), the mechanical and thermal withdrawal thresholds of sham mice ([von Frey]:  $3.93 \pm 0.58$  g;  $t=0.00$ ,  $p>0.99$ ; [IR40]:  $23.13 \pm 4.82$  s;  $t=0.32$ ,  $p=0.76$ ) and 6-OHDA mice ([von Frey]:  $2.35 \pm 0.37$  g;  $t=0.35$ ,  $p=0.74$ ; [IR40]:  $18.00 \pm 2.31$  s;  $t=0.65$ ,  $p=0.54$ ) returned to their baseline values before illumination. All data are means  $\pm$  SEM (8 mice per group), \* $p<0.05$ ; \*\* $p<0.01$  vs Before. **A2.** Amplitude of changes in pain thresholds (% of values before illumination). There was no significant effect caused by ADHD-like conditions in behavioral changes elicited by optogenetic activation of ACC excitatory neurons in response to mechanical ( $-59.38 \pm 5.31$  % vs  $-44.61 \pm 5.49$  %;  $t=1.95$ ,  $p=0.07$ ) and thermal ( $-63.95 \pm 4.70$  % vs  $-58.30 \pm 8.44$  %;  $t=0.59$ ,  $p=0.57$ ) stimuli. All data are means  $\pm$  SEM (8 mice per group).

**B.** Silencing of neurons in the left ACC of mice injected with the AAV5.CaMKII.ArchT.eGFP and behavioral assessment on the ipsilateral (left) hind paw. **B1.** Von Frey and Hargreaves tests before (Before), during (Opto) and at 2 minutes after (Recovery) illumination. There was a tendency but no significant effect of 575 nm light on withdrawal thresholds to mechanical (Before:  $4.05 \pm 0.96$  g vs Opto:  $5.88 \pm 0.85$  g;  $t=1.65$ ,  $p=0.14$ ) and thermal stimuli (Before:  $29.88 \pm 7.30$  s vs Opto:  $39.50 \pm 5.12$  s;  $t=1.53$ ,  $p=0.17$ ) in sham mice. In contrast, there was a significant effect of 575 nm light on withdrawal thresholds to mechanical (Before:  $2.23 \pm 0.41$  g vs Opto:  $4.50 \pm 0.73$  g;  $t=2.89$ ,  $p=0.02$ ) and thermal (Before:  $19.75 \pm 3.58$  s vs Opto:  $31.38 \pm 3.85$  s;  $t=3.07$ ,  $p=0.02$ ) stimuli in the 6-OHDA group. After the light was off, the mechanical and thermal withdrawal thresholds of 6-OHDA mice returned to their baseline values ([von Frey]:  $1.90 \pm 0.33$  g;  $t=1.24$ ,  $p=0.25$ ; [IR40]:  $20.00 \pm 2.71$  s;  $t=0.04$ ,  $p=0.97$ ). All data are means  $\pm$  SEM (8 mice per group), \* $p<0.05$  vs Before. **B2.** Amplitude of changes in pain thresholds (% of values before illumination). There was no significant effect caused by ADHD-like conditions in behavioral changes elicited by optogenetic inhibition of ACC excitatory neurons in response to mechanical ( $109.82 \pm 19.97$  % vs  $81.55 \pm 33.68$  %;  $t=0.72$ ,  $p=0.48$ ) and thermal ( $71.83 \pm 19.04$  % vs  $64.80 \pm 22.37$  %;  $t=0.24$ ,  $p=0.81$ ) stimuli. All data are means  $\pm$  SEM (8 mice per group).

**Fig. S4: Control of the effects of ACC neurons optogenetic modulation on nociceptive sensitization.**

**A.** Illumination of neurons in the left ACC of mice injected with the AAV5.CaMKII.eGFP and behavioral assessment. **A1.** Von Frey and Hargreaves tests on contralateral hind paw. **A2.** Von Frey and Hargreaves tests on ipsilateral hind paw. There was no significant effect of 473 nm light before (Before), during (Opto) and at 2 minutes after (Recovery) illumination on mechanical or thermal thresholds of hind paw of sham mice (upper panels; ipsilateral: [von Frey]:  $t=0.00$ ,  $p>0.99$ ; [IR40]:  $t=0.09$ ,  $p=0.93$ ; contralateral: [von Frey]:  $t=0.11$ ,  $p=0.92$ ; [IR40]:  $t=0.06$ ,  $p=0.95$ ) and 6-OHDA mice (lower panels; ipsilateral: [von Frey]:  $t=0.17$ ,  $p=0.87$ ; [IR40]:  $t=0.00$ ,  $p>0.99$ ; contralateral: [von Frey]:  $t=0.04$ ,  $p=0.97$ ; [IR40]:  $t=0.24$ ,  $p=0.82$ ). All data are means  $\pm$  SEM (8 mice per group).

**B.** Illumination of neurons in the left ACC of mice injected with the AAV5.CaMKII. eGFP and contralateral (right) DHN recording. **B1.** Single unit *in vivo* extracellular recording of DHN activity in response to peripheral mechanical stimuli. **B2.** Quantification of action potentials per 5 seconds upon peripheral mechanical stimulus, before, during and after 2 minutes of 473 nm light. Two-way repeated measures ANOVA showed a significant effect of lesion (6-OHDA) ( $F_{(1,7)}=91.31$ ,  $p<0.0001$  and  $F_{(1,7)}=34.94$ ,  $p=0.0006$ ) on DHN discharge in response to innocuous (1.4g) and noxious (6.0g) peripheral stimulation, respectively. Light stimulation (Opto) ( $F_{(2,14)}=0.09$ ;  $p=0.92$  and  $F_{(2,14)}=0.02$ ;  $p=0.98$ ) and the interaction 6-OHDA  $\times$  Opto ( $F_{(2,14)}=0.27$ ,  $p=0.77$  and  $F_{(2,14)}=0.007$ ,  $p=0.99$ ) had no effect. There was no significant effect of 473 nm light on DHN activity in response to innocuous ([1.4g]: sham:  $q=0.74$ ,  $p>0.05$ ; 6-OHDA:  $q=0.00$ ,  $p>0.05$ ) and noxious stimuli ([6.0g]: sham:  $q=0.08$ ,  $p>0.05$ ; 6-OHDA:  $q=0.04$ ,  $p>0.05$ ) in both groups. All data are means  $\pm$  SEM (8 mice per group), \* $p<0.05$ ; \*\* $p<0.01$ ; \*\*\* $p<0.001$  vs Sham.

**Fig. S5. Optogenetic modulation of the ACC – Posterior Insula (PI) excitatory pathway potentiates sensitization of the ipsilateral paw in 6-OHDA mice.**

**A.** Activation of the left ACC-PI excitatory pathway in mice injected with the AAV5.CaMKII.ChR2.eGFP and behavioral assessment on the ipsilateral (left) hind paw. **A1.** Von Frey and Hargreaves tests before (Before), during (Opto) and at 2 minutes after (Recovery) illumination. There was a significant effect of 473 nm light on withdrawal thresholds to mechanical ([Sham]: Before:  $4.18 \pm 0.74$  g vs Opto:  $2.03 \pm 0.30$  g;  $t=2.97$ ,  $p=0.02$ ; [6-OHDA]: Before:  $2.18 \pm 0.27$  g vs Opto:  $1.43 \pm 0.10$  g;  $t=3.70$ ,  $p=0.008$ ) and thermal ([Sham]: Before:  $24.63 \pm 3.94$  s vs Opto:  $15.13 \pm 3.25$  s;  $t=3.43$ ,  $p=0.02$ ; [6-OHDA]: Before:  $17.25 \pm 1.22$  s vs Opto:  $10.50 \pm 1.02$  s;  $t=3.56$ ,  $p=0.009$ ) stimuli in both groups. After the light was off (Recovery), changes in mechanical and thermal withdrawal thresholds of sham mice ([von Frey]:  $2.13 \pm 0.42$  g;  $t=2.43$ ,  $p=0.04$ ; [IR40]:  $15.00 \pm 2.69$  s;  $t=2.46$ ,  $p=0.04$ ) were maintained until 2 minutes after the optogenetic stimulation was stopped, and returned to the baseline values before illumination after 5 minutes ([von Frey]:  $4.00 \pm 0.65$  g;  $t=0.14$ ,  $p=0.89$ ; [IR40]:  $24.63 \pm 3.86$  s;  $t=0.00$ ,  $p>0.99$ ). In contrast, changes in mechanical and thermal withdrawal thresholds of the 6-OHDA group were further amplified at 2 minutes after the illumination was off ([von Frey]:  $0.55 \pm 0.07$  g;  $t=5.40$ ,  $p=0.001$ ; [IR40]:  $6.00 \pm 0.73$  s;  $t=7.83$ ,  $p=0.0001$ ). After 5 minutes, thermal withdrawal latency returned to baseline levels ([IR40]:  $15.88 \pm 1.90$  s;  $t=0.52$ ,  $p=0.62$ ), while the mechanical threshold was not fully restored ([von Frey]:  $1.35 \pm 0.17$  g;  $t=3.43$ ,  $p=0.02$ ). All data are means  $\pm$  SEM (8 mice per group), \* $p<0.05$ ; \*\* $p<0.01$ ; \*\*\* $p<0.001$  vs Before; ## $p<0.01$ ; ### $p<0.001$  vs Opto. **A2.** Amplitude of changes in withdrawal threshold and latency between ‘Before’ and ‘Opto’ or ‘Recovery (2 min)’ conditions (% of values before illumination). Two-way ANOVA showed no significant effect on the mechanical withdrawal threshold of lesion (6-OHDA) ( $F_{(1,28)}=1.16$ ,

$p=0.29$ ), light stimulation (Opto) ( $F_{(1,28)}=0.07$ ;  $p=0.79$ ) and interaction 6-OHDA x Opto ( $F_{(1,28)}=0.17$ ,  $p=0.68$ ). In contrast, there was a significant effect of lesion (6-OHDA)  $F_{(1,28)}=7.67$ ,  $p=0.001$ ), but not light stimulation (Opto)  $F_{(1,28)}=3.53$ ;  $p=0.07$ ), on thermal withdrawal latency. The interaction 6-OHDA x Opto had a main effect on thermal withdrawal latency  $F_{(1,28)}=5.32$ ,  $p=0.03$ ). Changes were greater in 6-OHDA conditions than in sham at 2 minutes recovery in response to thermal ( $-65.91 \pm 1.78\%$  vs  $-34.39 \pm 8.04\%$ ;  $q=5.08$ ,  $p<0.01$ ), but not to mechanical ( $-37.14 \pm 6.59\%$  vs  $-41.88 \pm 9.01\%$ ;  $q=0.67$ ,  $p>0.05$ ) stimulus. All data are means  $\pm$  SEM (8 mice per group), \* $p<0.05$  vs Sham; ## $p<0.01$ ; vs Opto.

**B.** Silencing of the left ACC-PI excitatory pathway in mice injected with AAV5.CaMKII.ArchT.eGFP and behavioral assessment on the ipsilateral (left) hind paw. **B1.** Von Frey and Hargreaves tests before (Before), during (Opto) and at 2 minutes after (Recovery) illumination. There was a significant effect of 575 nm light on withdrawal thresholds to mechanical ([sham]: Before:  $4.00 \pm 0.53$  g vs, Opto:  $5.25 \pm 0.65$  g;  $t=3.42$ ,  $p=0.02$ ; [6-OHDA]: Before:  $1.80 \pm 0.14$  g vs Opto:  $3.25 \pm 0.37$  g;  $t=3.71$ ,  $p=0.008$ ) and thermal ([sham]: Before:  $24.25 \pm 3.41$  s vs Opto:  $32.63 \pm 2.83$  s;  $t=2.51$ ,  $p=0.04$ ; [6-OHDA]: Before:  $19.75 \pm 1.54$  s vs Opto:  $28.63 \pm 2.10$  s;  $t=3.56$ ,  $p=0.009$ ) stimuli in both groups. After the light was off, changes in mechanical and thermal withdrawal in sham mice were maintained during 2 minutes ([von Frey]:  $5.50 \pm 0.50$  g;  $t=2.39$ ,  $p=0.04$ ; [IR40]:  $33.25 \pm 2.48$  s;  $t=2.46$ ,  $p=0.04$ ), and returned to the baseline values after 5 minutes ([von Frey]:  $3.75 \pm 0.45$  g;  $t=0.31$ ,  $p=0.76$ ; [IR40]:  $25.25 \pm 2.90$  s;  $t=0.20$ ,  $p=0.85$ ). In contrast, changes in mechanical and thermal pain threshold of the 6-OHDA group were further amplified at 2 minutes after the illumination was off ([von Frey]:  $4.50 \pm 0.33$  g;  $t=5.87$ ,  $p=0.0006$ ; [IR40]:  $34.38 \pm 1.65$  s;  $t=8.21$ ,  $p<0.0001$ ). After 5 minutes, this increase was fully abolished in the 6-OHDA group ([von Frey]:  $1.95 \pm 0.31$  g;  $t=0.52$ ,  $p=0.62$ ; [IR40]:  $18.75 \pm 1.70$  s;  $t=0.44$ ,  $p=0.67$ ). All data are means  $\pm$  SEM (8 mice per group), \* $p<0.05$ ; \*\* $p<0.01$ ; \*\*\* $p<0.001$  vs Before; # $p<0.05$  vs Opto. **B2.** Amplitude of changes in withdrawal threshold and latency between 'Before' and 'Opto' or 'Recovery (2 min)' conditions (% of values before illumination). Two-way ANOVA showed no significant effect on the mechanical withdrawal threshold of lesion (6-OHDA) ( $F_{(1,28)}=20.84$ ,  $p<0.0001$ ), light stimulation (Opto) ( $F_{(1,28)}=7.22$ ;  $p=0.01$ ), and interaction 6-OHDA x Opto ( $F_{(1,28)}=3.86$ ,  $p=0.06$ ). Similarly, there was no significant effect on thermal thresholds of lesion (6-OHDA)  $F_{(1,28)}=2.37$ ,  $p=0.13$ ), light stimulation period (Opto)  $F_{(1,28)}=2.64$ ;  $p=0.12$ ) and interaction 6-OHDA x Opto  $F_{(1,28)}=1.36$ ,  $p=0.25$ ). Changes were greater in 6-OHDA conditions than in sham at 2 minutes recovery in response to mechanical ( $160.71 \pm 26.00\%$  vs  $47.92 \pm 13.52\%$ ;  $q=6.53$ ,  $p<0.001$ ), but not thermal ( $81.58 \pm 16.06\%$  vs  $48.46 \pm 12.59\%$ ;  $q=2.71$ ,  $p>0.05$ ) stimulus. All data are means  $\pm$  SEM (8 mice per group), \*\*\* $p<0.001$  vs Sham; # $p<0.05$  vs Opto.

**Fig. S6. Control of the effects of optogenetic modulation of the ACC-PI pathway on nociceptive sensitization.**

**A.** Illumination of the left ACC-PI pathway of mice injected with the AAV5.CaMKII.eGFP and behavioral assessment. **A1.** Von Frey and Hargreaves tests on contralateral hind paw. **A2.** Von Frey and Hargreaves tests on ipsilateral hind paw. There was no significant effect of 473 nm light before (Before), during (Opto) and at 2 minutes after (Recovery) illumination on mechanical or thermal thresholds of hind paw of sham mice (upper panels; ipsilateral: [von Frey]:  $t=0.24$ ,  $p=0.82$ ; [IR40]:  $t=0.09$ ,  $p=0.93$ ; contralateral: [von Frey]:  $t=0.00$ ,  $p>0.99$ ; [IR40]:  $t=0.16$ ,  $p=0.88$ ) and 6-OHDA mice (lower panels; ipsilateral: [von Frey]:  $t=0.15$ ,  $p=0.88$ ; [IR40]:  $t=0.00$ ,  $p>0.99$ ;



contralateral: [von Frey]:  $t=0.00$ ,  $p=0.99$ ; [IR40]:  $t=0.14$ ,  $p=0.89$ ) hind paw. All data are means  $\pm$  SEM (8 mice per group).

**B.** Illumination of the left ACC-PI pathway of mice injected with the AAV5.CaMKII.eGFP and contralateral (right) DHN recording. **B1.** Single unit *in vivo* extracellular recording of DHN activity in response to peripheral mechanical stimuli. **B2.** Quantification of action potentials per 5 seconds upon peripheral stimulus, before, during and after 2 minutes of 473 nm light. Two-way repeated measures ANOVA showed a significant effect of lesion (6-OHDA) ( $F_{(1,7)}=111.30$ ,  $p<0.0001$  and  $F_{(1,7)}=92.60$ ,  $p<0.0001$ ) on DHN discharges in response to innocuous (1.4g) and noxious (6.0g) peripheral stimulation, respectively. Light stimulation (Opto) ( $F_{(3,21)}=0.08$ ;  $p=0.97$  and  $F_{(3,21)}=0.09$ ;  $p=0.96$ ) and the interaction 6-OHDA x Opto ( $F_{(3,21)}=0.02$ ,  $p=0.99$  and  $F_{(3,21)}=0.04$ ,  $p=0.99$ ) had no effect. There was no significant effect of 473 nm light on DHN activity in response to innocuous ([1.4g]: sham:  $q=0.00$ ,  $p>0.05$ ; 6-OHDA:  $q=0.38$ ,  $p>0.05$ ) and noxious stimuli ([6.0g]: sham:  $q=0.58$ ,  $p>0.05$ ; 6-OHDA:  $q=0.13$ ,  $p>0.05$ ) in both groups. All data are means  $\pm$  SEM (8 mice per group), \* $p<0.05$ ; \*\* $p<0.01$ ; \*\*\* $p<0.001$  vs Sham.

**Fig. S7.** Schematic representation of the experimental design.

**A.** Animal experimentation design related to figures 1, 2, 3, S1 and S2.

**B.** Animal experimentation design related to figures 4.

**C.** Animal experimentation design related to figure 5.

**D.** Animal experimentation design related to figure 6, 7, S4, S4, S5 and S6.

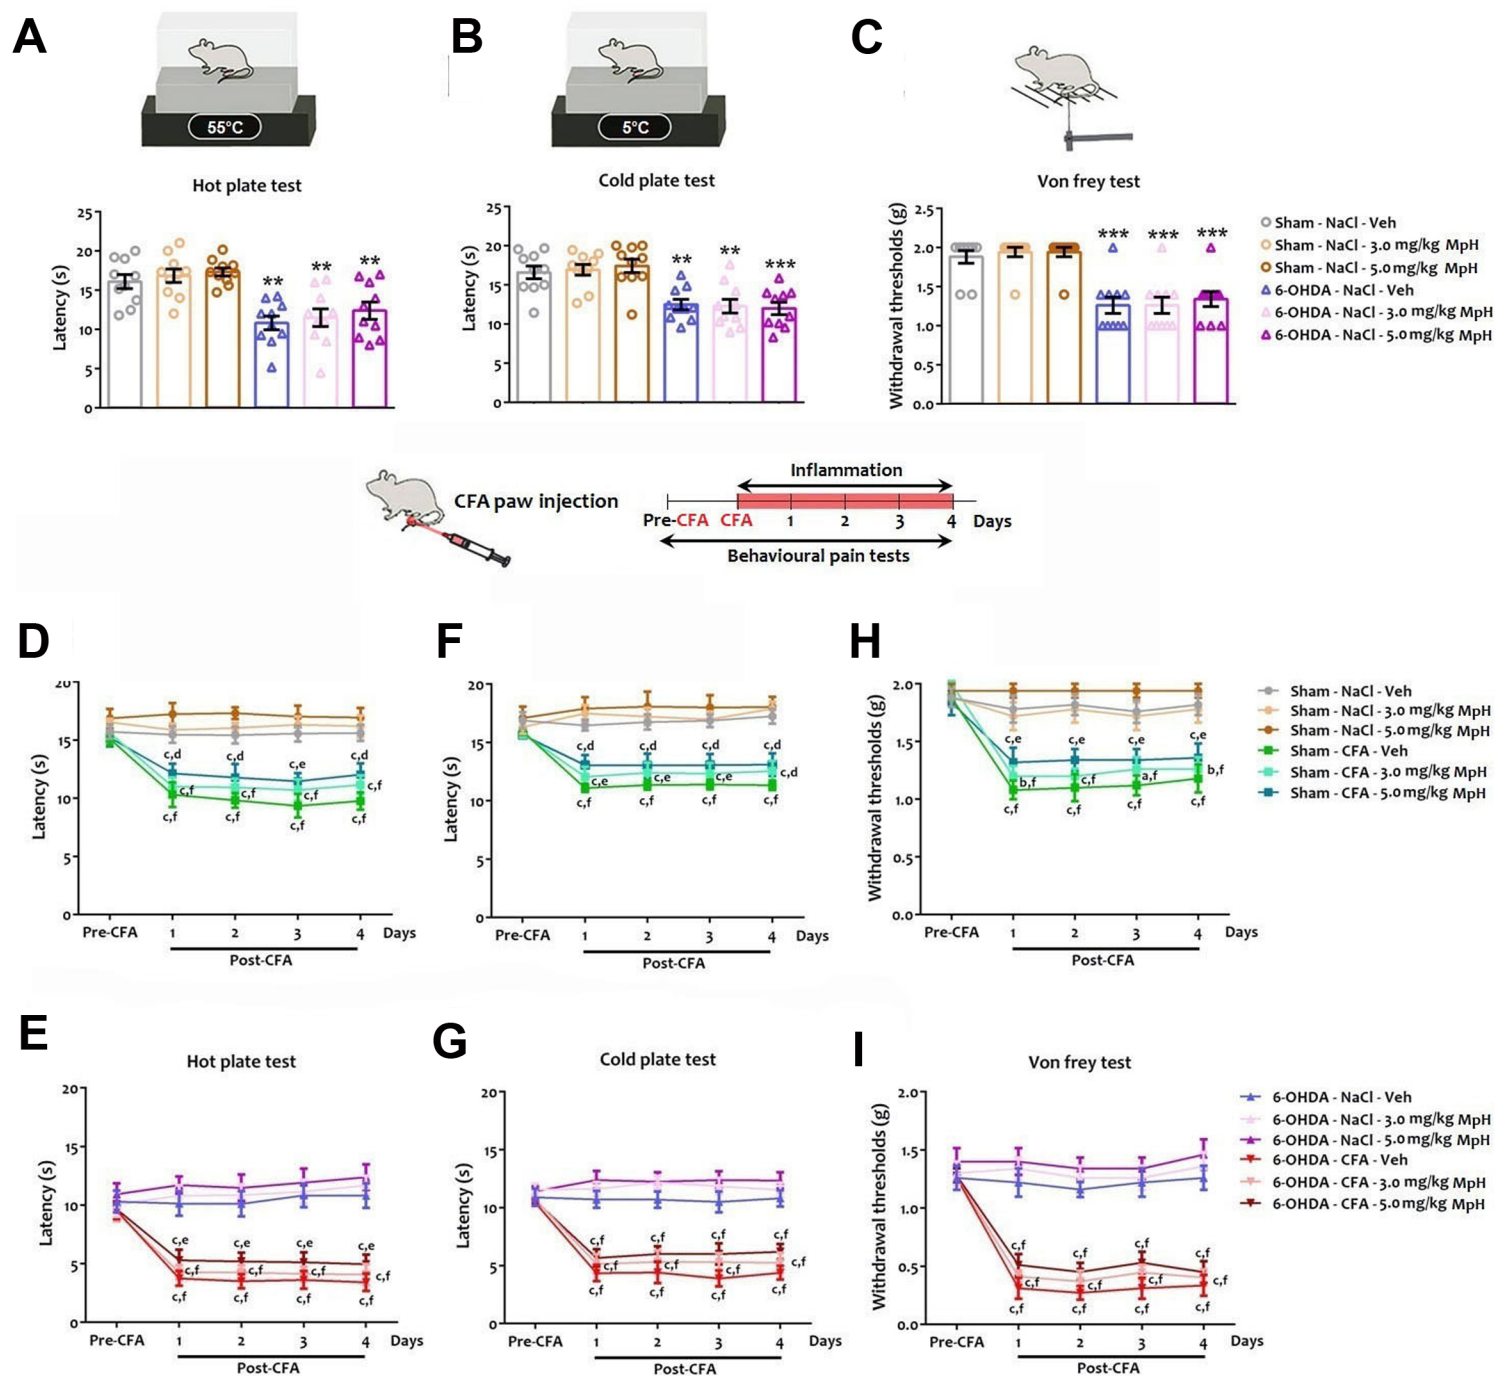

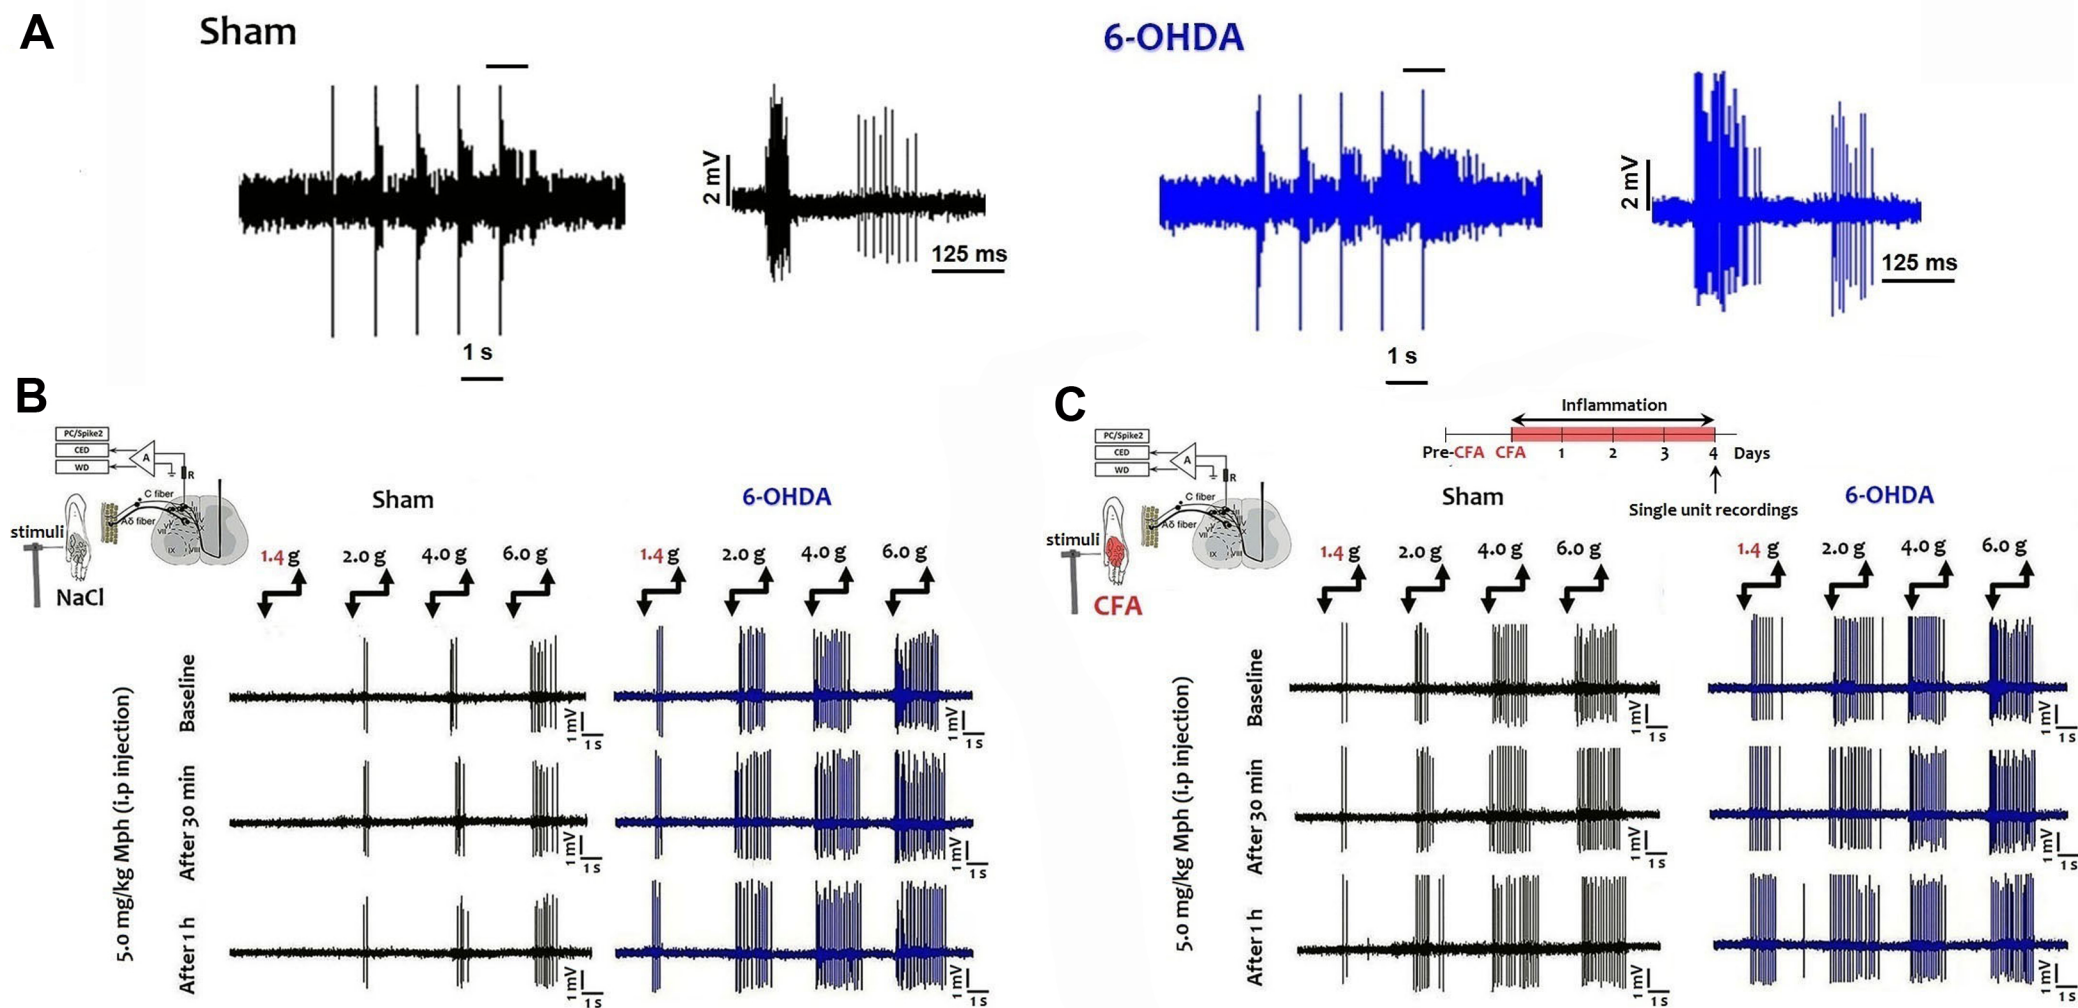

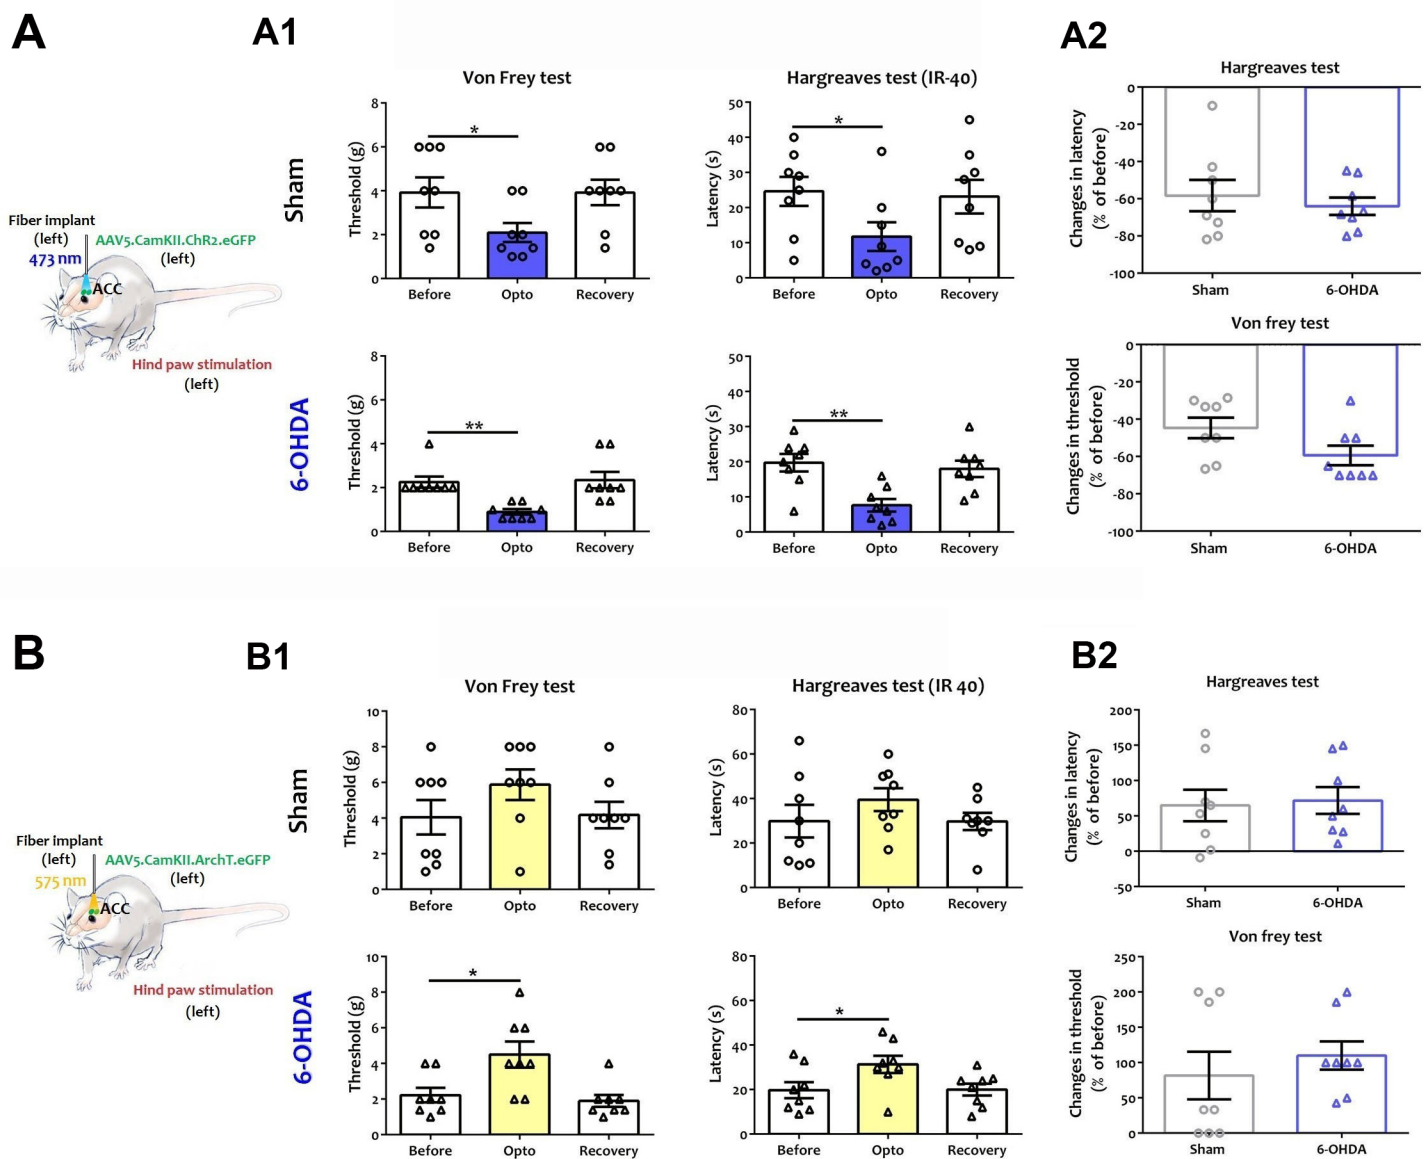

**A**

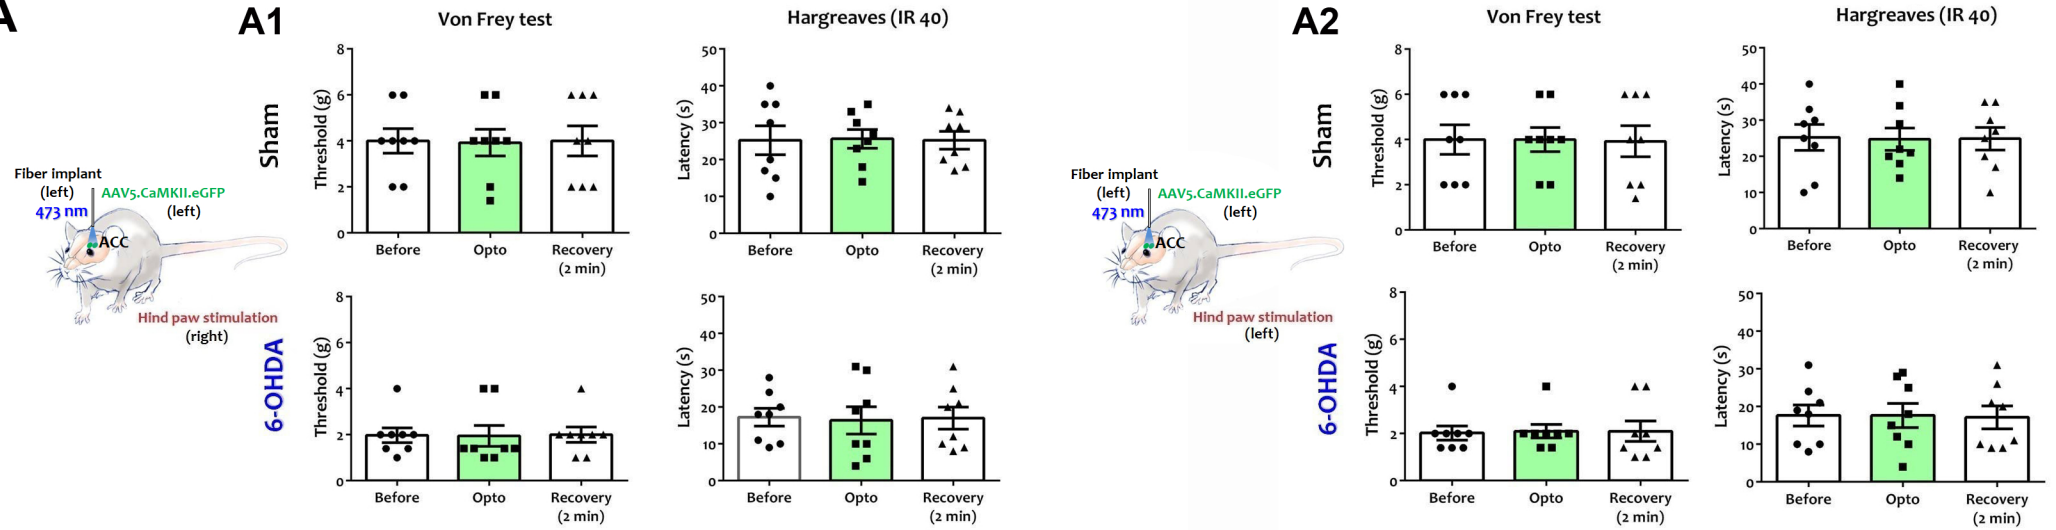

**B**

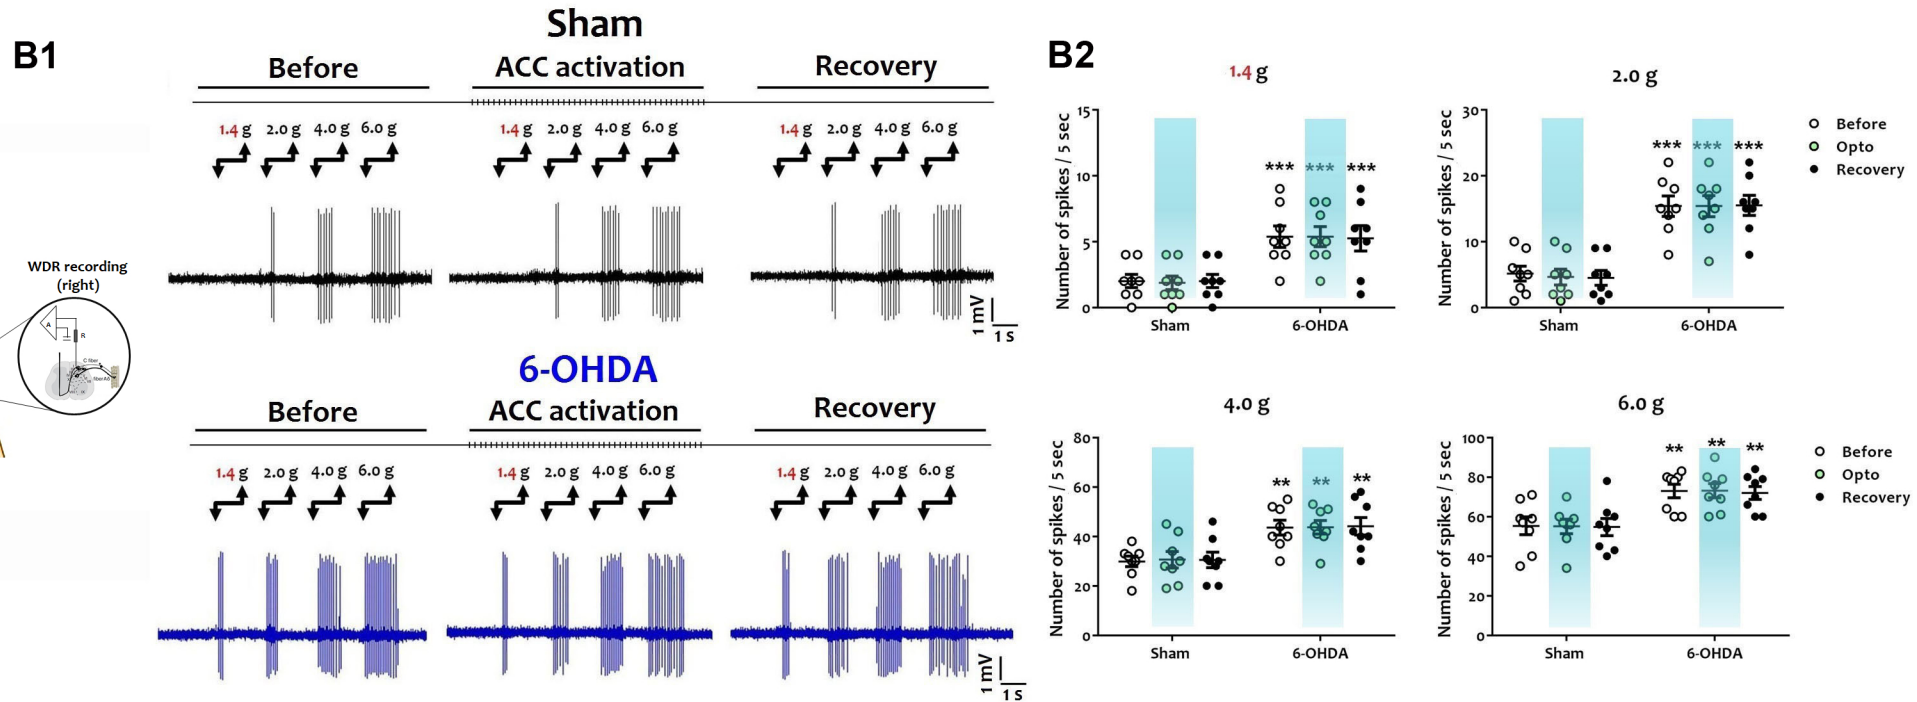



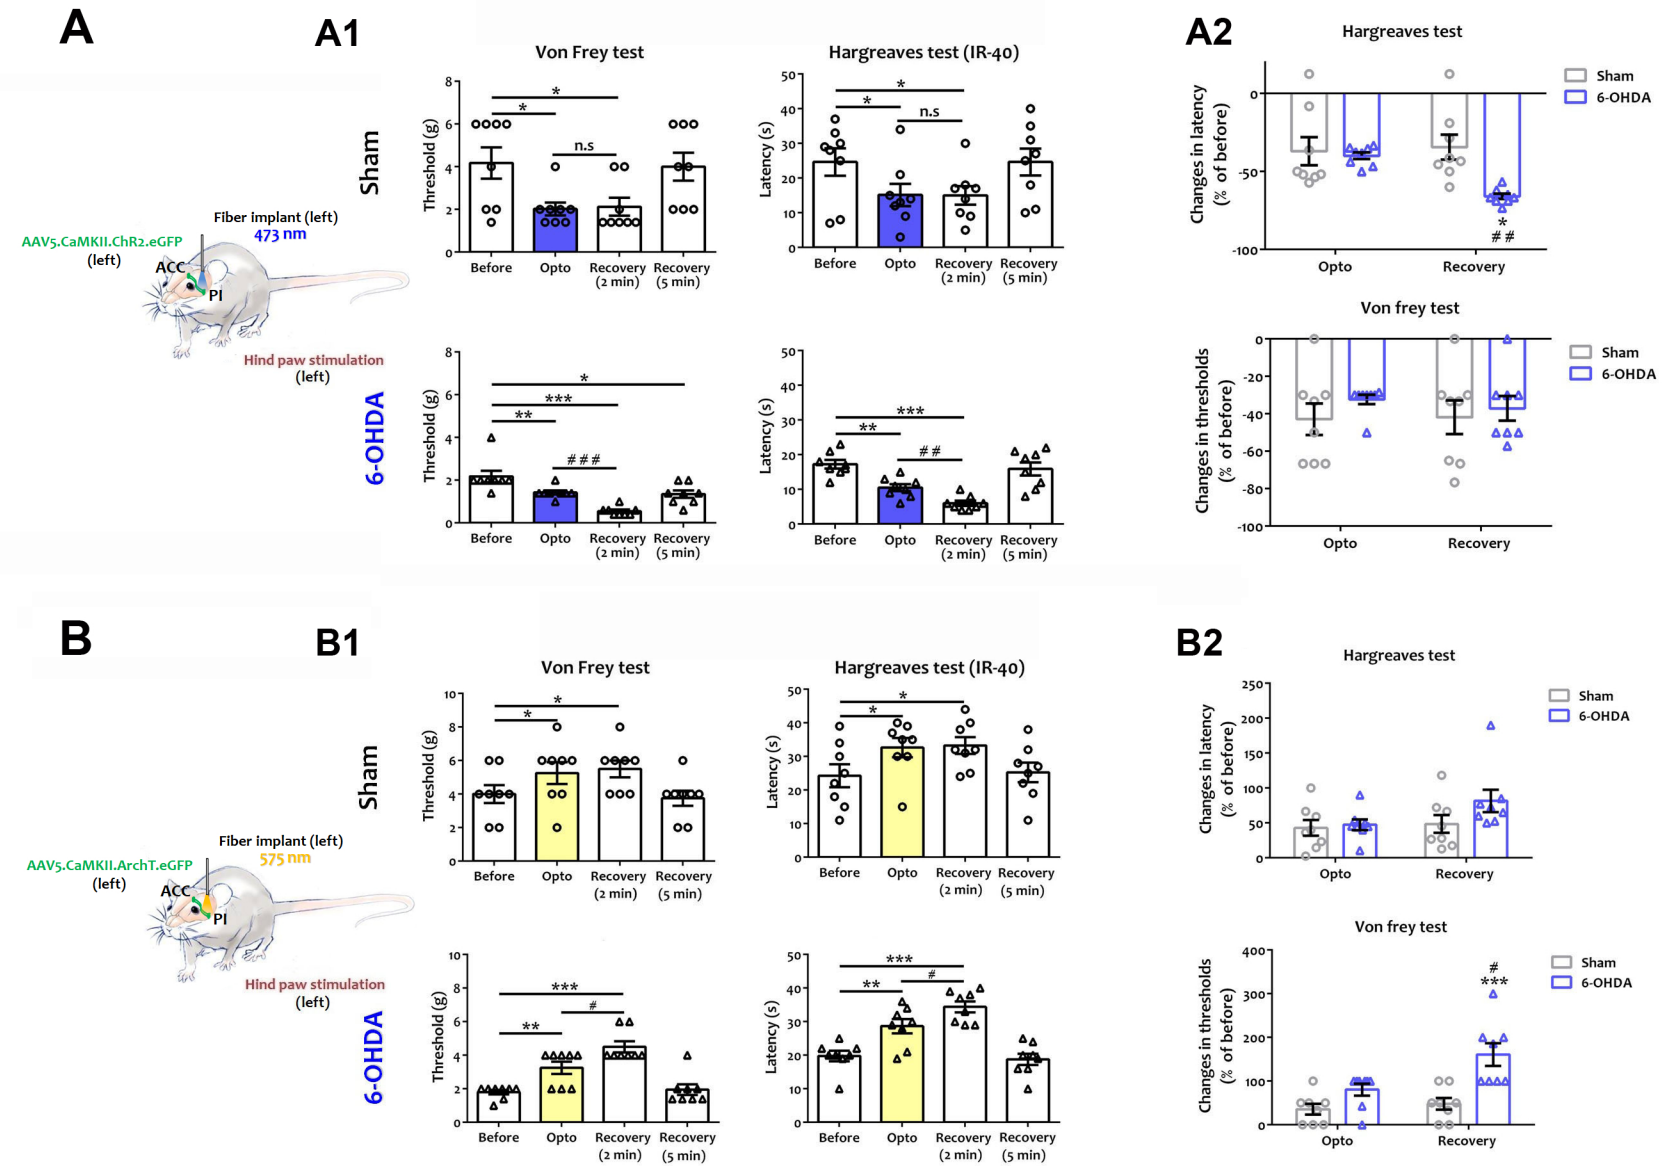

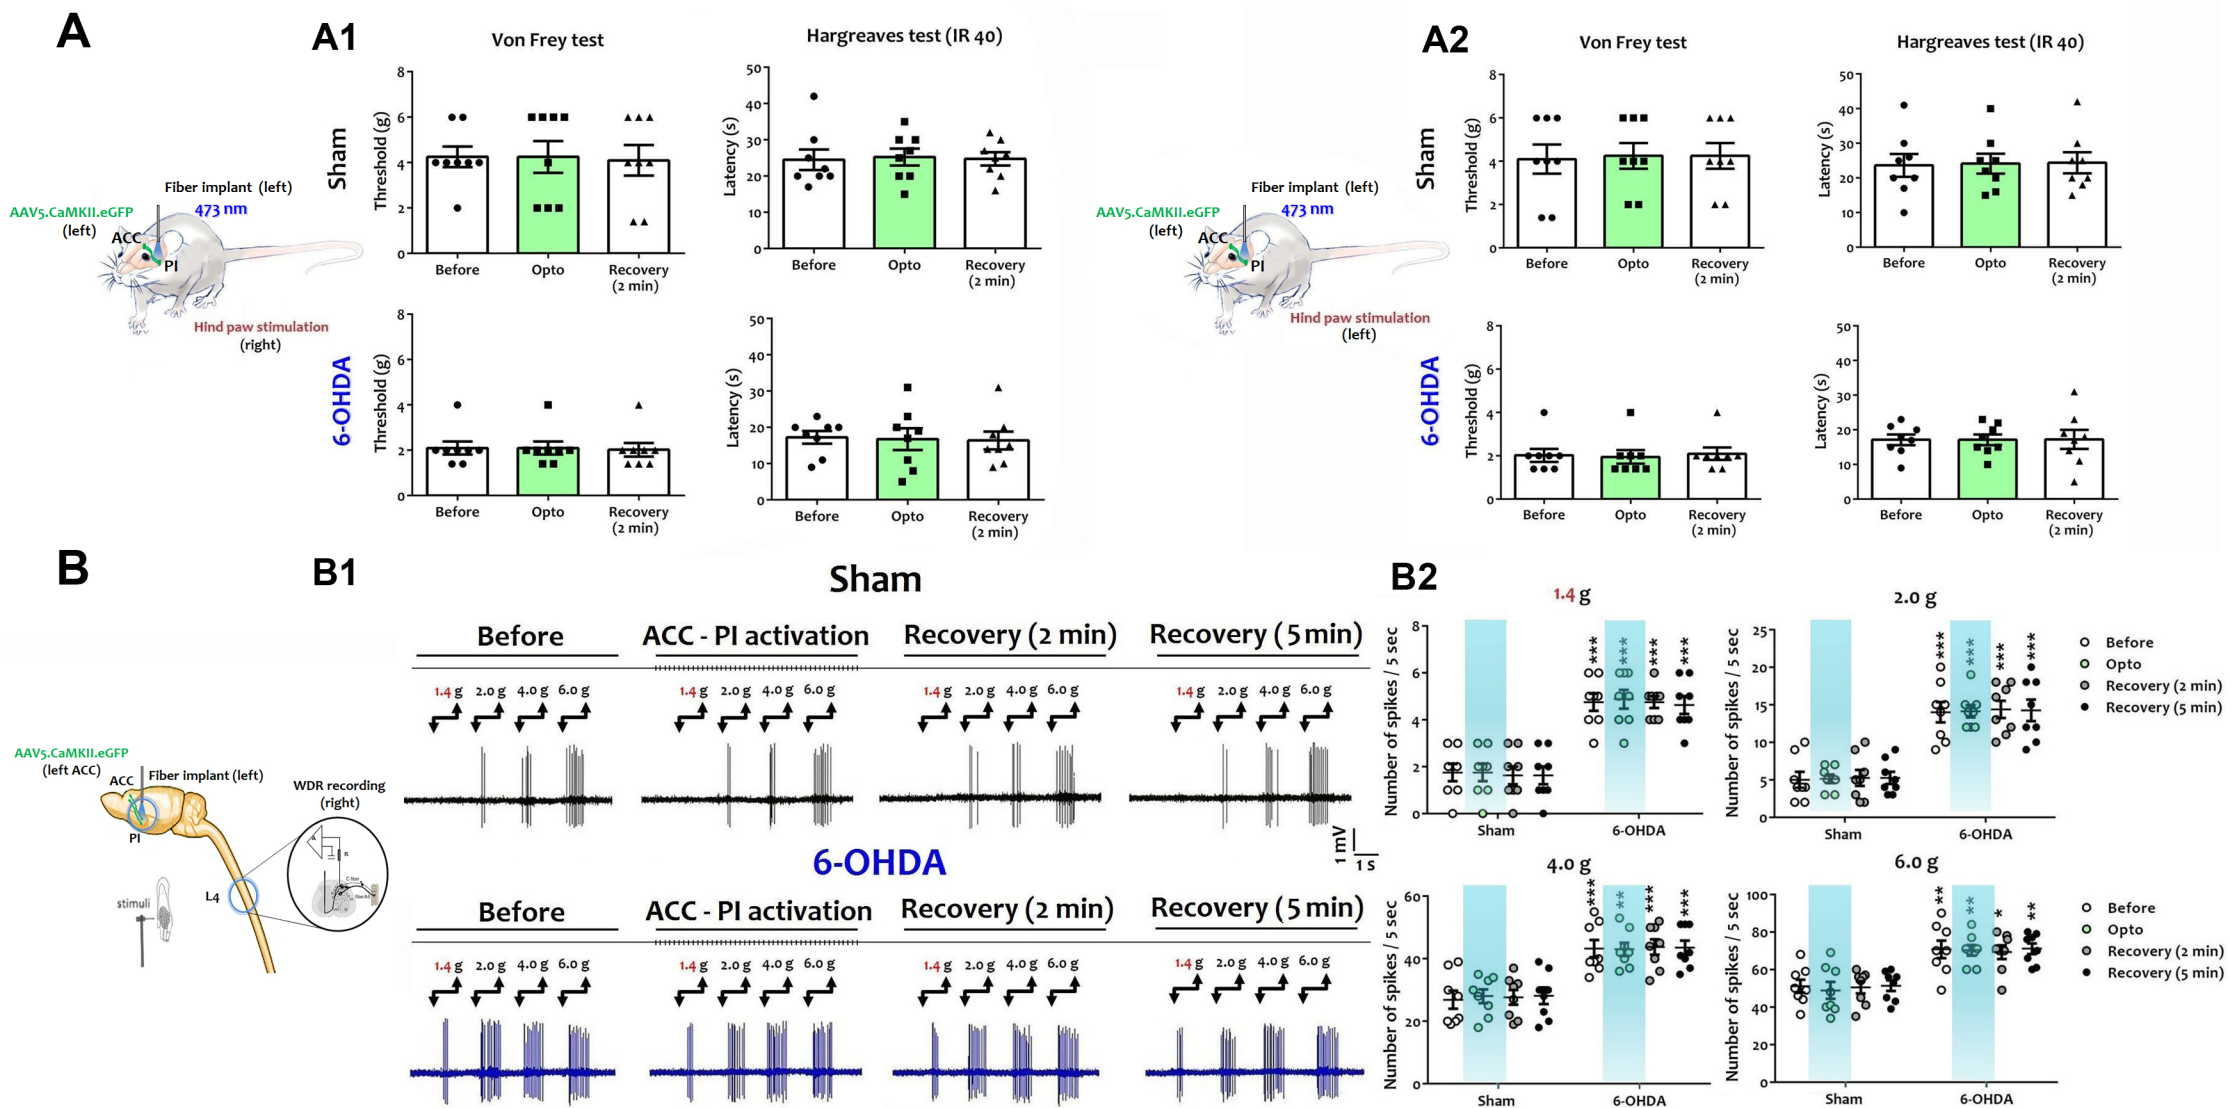

**A**

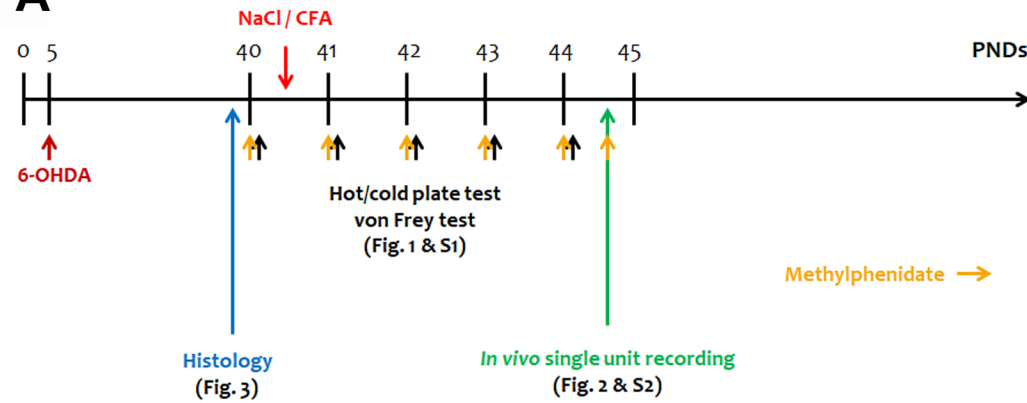

**C**

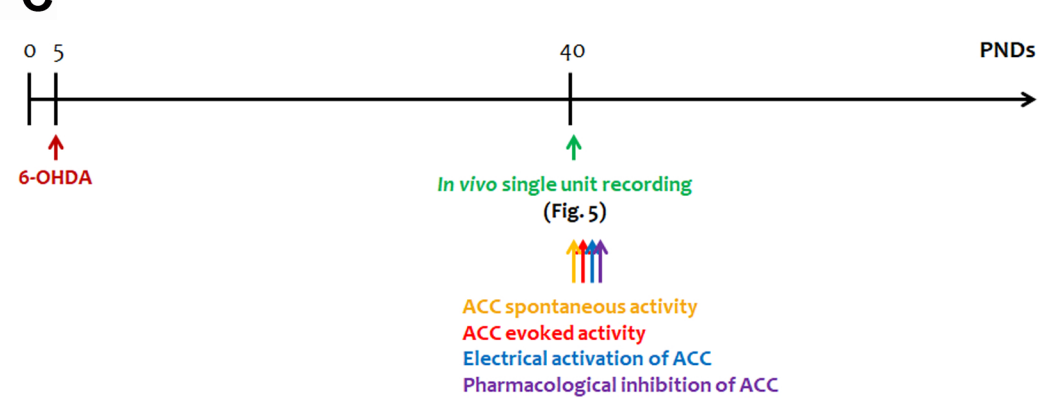

**B**

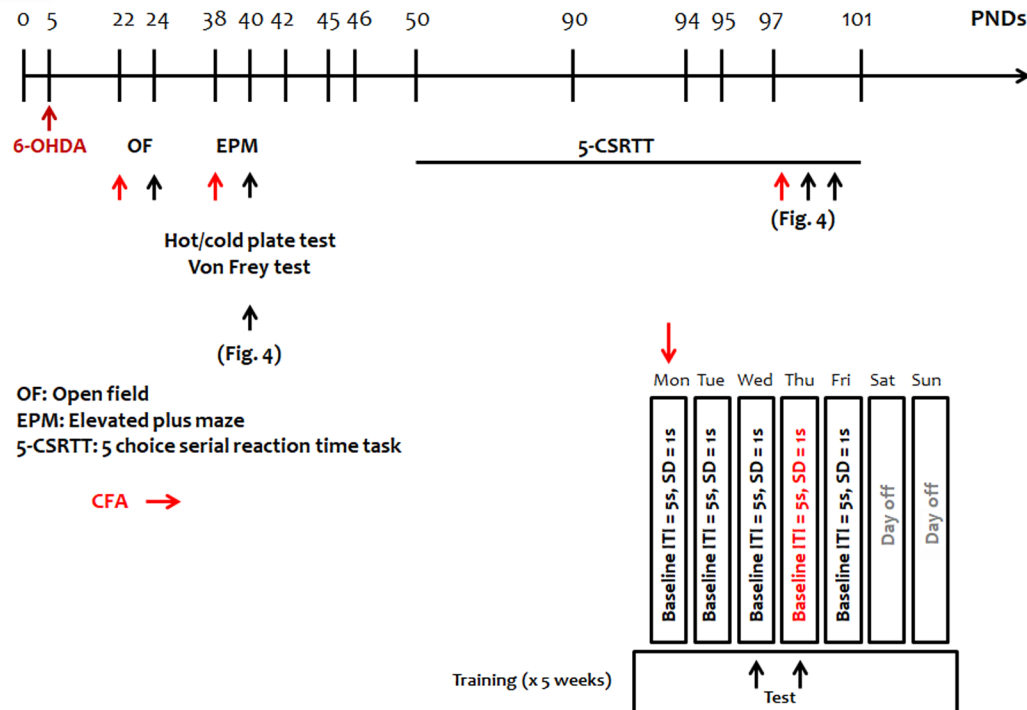

**D**

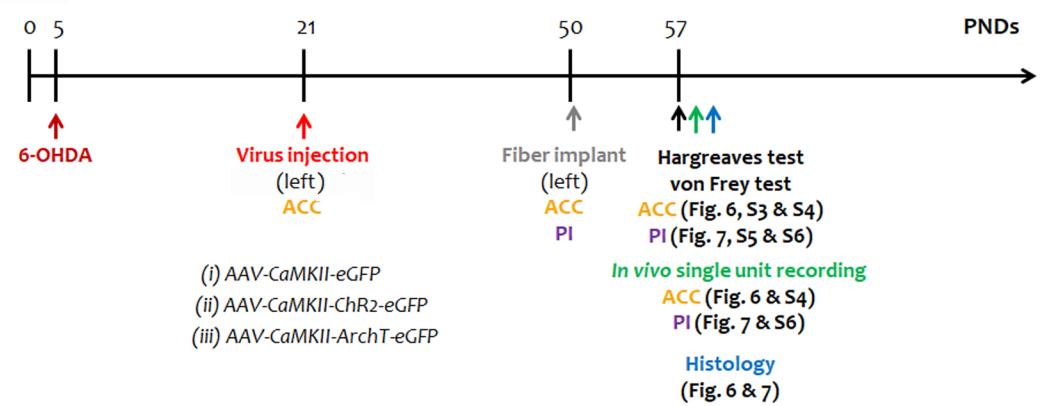

Supplement: Supplementary file 1 [file 29903eea42573d21039534dc.pdf]
